# Supplementary material for: Intermolecular hydrogen bond in molecules with large amplitude motions: rotational spectrum of the complex 3,3-dimethyloxetane⋯hydrogen fluoride
Source: Royal Society of Chemistry journal article supplement (doi:10.1039/b415589k), 2005-01-01
Supplement: b415589k.pdf [file b415589k.pdf]

**Intermolecular Hydrogen Bond in Molecules with Large  
Amplitude Motions: Rotational Spectrum of the complex 3,3  
Dimethyloxetane...Hydrogen Fluoride**

---

**Raquel Sánchez, Susana Blanco, Alberto Lesarri Juan C. López and José L. Alonso**

*Grupo de Espectroscopía Molecular (GEM), Departamento de Química Física y Química Inorgánica, Facultad de Ciencias, Universidad de Valladolid, E-47005 Valladolid, SPAIN. Fax: +34983423204; Tel: +34-983423204; E-mail: raquelsm@qf.uva.es; jclopez@qf.uva.es, lesarri@qf.uva.es, jlonso@qf.uva.es*

**Supplementary data**

**3 Tables**

**Table S1.** Rotational transitions (in MHz) measured for the main species of the axial conformer of 3,3-methyloxetane...HF complex.

| $J'$ | $K'_{-l}$ | $K'_{+l}$ | $J''$ | $K''_{-l}$ | $K''_{+l}$ | $I'$ | $F'$ | $I''$ | $F''$ | <i>obs.</i> | <i>obs.-cal.<sup>a</sup></i> |
|------|-----------|-----------|-------|------------|------------|------|------|-------|-------|-------------|------------------------------|
| 3    | 0         | 3         | 2     | 0          | 2          | 1    | 4    | 1     | 3     | 8525.122    | -0.001                       |
| 3    | 1         | 3         | 2     | 1          | 2          | 1    | 4    | 1     | 3     | 8297.445    | 0.001                        |
| 3    | 1         | 2         | 2     | 1          | 1          | 1    | 4    | 1     | 3     | 8806.380    | -0.002                       |
| 3    | 2         | 2         | 2     | 2          | 1          | 1    | 4    | 1     | 3     | 8556.985    | -0.001                       |
| 3    | 2         | 1         | 2     | 2          | 0          | 1    | 3    | 1     | 2     | 8588.704    | 0.005                        |
| 3    | 2         | 1         | 2     | 2          | 0          | 1    | 4    | 1     | 3     | 8588.725    | 0.000                        |
| 3    | 2         | 1         | 2     | 2          | 0          | 1    | 2    | 1     | 1     | 8588.740    | 0.000                        |
| 4    | 0         | 4         | 3     | 0          | 3          | 1    | 5    | 1     | 4     | 11330.345   | -0.001                       |
| 4    | 1         | 4         | 3     | 1          | 3          | 1    | 5    | 1     | 4     | 11054.327   | -0.001                       |
| 4    | 1         | 3         | 3     | 1          | 2          | 1    | 5    | 1     | 4     | 11731.732   | -0.001                       |
| 4    | 2         | 3         | 3     | 2          | 2          | 1    | 4    | 1     | 3     | 11402.886   | -0.003                       |
| 4    | 2         | 3         | 3     | 2          | 2          | 1    | 5    | 1     | 4     | 11402.902   | 0.001                        |
| 4    | 2         | 2         | 3     | 2          | 1          | 1    | 5    | 1     | 4     | 11481.479   | 0.000                        |
| 4    | 3         | 2         | 3     | 3          | 1          | 1    | 5    | 1     | 4     | 11424.534   | 0.005                        |
| 4    | 3         | 1         | 3     | 3          | 0          | 1    | 5    | 1     | 4     | 11425.934   | 0.004                        |
| 5    | 0         | 5         | 4     | 0          | 4          | 1    | 6    | 1     | 5     | 14106.656   | 0.000                        |
| 5    | 1         | 5         | 4     | 1          | 4          | 1    | 6    | 1     | 5     | 13804.237   | -0.002                       |
| 5    | 1         | 4         | 4     | 1          | 3          | 1    | 6    | 1     | 5     | 14647.713   | 0.000                        |
| 5    | 2         | 3         | 4     | 2          | 2          | 1    | 6    | 1     | 5     | 14397.450   | 0.000                        |
| 5    | 3         | 3         | 4     | 3          | 2          | 1    | 5    | 1     | 4     | 14286.229   | 0.000                        |
| 5    | 3         | 3         | 4     | 3          | 2          | 1    | 6    | 1     | 5     | 14286.238   | -0.005                       |
| 5    | 3         | 2         | 4     | 3          | 1          | 1    | 5    | 1     | 4     | 14291.109   | -0.005                       |
| 5    | 3         | 2         | 4     | 3          | 1          | 1    | 6    | 1     | 5     | 14291.129   | 0.002                        |
| 6    | 0         | 6         | 5     | 0          | 5          | 1    | 7    | 1     | 6     | 16851.429   | 0.002                        |
| 6    | 1         | 6         | 5     | 1          | 5          | 1    | 7    | 1     | 6     | 16546.229   | 0.000                        |
| 6    | 1         | 5         | 5     | 1          | 4          | 1    | 7    | 1     | 6     | 17551.093   | 0.000                        |
| 6    | 2         | 5         | 5     | 2          | 4          | 1    | 7    | 1     | 6     | 17076.980   | 0.001                        |
| 6    | 3         | 4         | 5     | 3          | 3          | 1    | 7    | 1     | 6     | 17150.494   | 0.000                        |
| 6    | 3         | 3         | 5     | 3          | 2          | 1    | 7    | 1     | 6     | 17163.442   | 0.001                        |
| 6    | 4         | 3         | 5     | 4          | 2          | 1    | 7    | 1     | 6     | 17140.383   | 0.001                        |
| 6    | 4         | 2         | 5     | 4          | 1          | 1    | 7    | 1     | 6     | 17140.585   | -0.001                       |
| 2    | 1         | 2         | 1     | 0          | 1          | 1    | 3    | 1     | 2     | 8160.713    | -0.001                       |
| 3    | 1         | 3         | 2     | 0          | 2          | 1    | 4    | 1     | 3     | 10761.469   | 0.001                        |
| 4    | 1         | 4         | 3     | 0          | 3          | 1    | 5    | 1     | 4     | 13290.674   | 0.001                        |
| 5    | 1         | 5         | 4     | 0          | 4          | 1    | 6    | 1     | 5     | 15764.564   | -0.001                       |

<sup>a</sup>Observed-calculated values from rotational parameters of Table 2.

**Table S2.** Rotational transitions (in MHz) for the isotopic species of the axial conformer of 3,3dimethyloxetane⋯HF complex.

|      |           |           |       |            |            | $^{13}\text{C}_a\text{C}_4\text{H}_{10}\text{O}\cdots\text{HF}$ |                              | $^{13}\text{C}_b\text{C}_4\text{H}_{10}\text{O}\cdots\text{HF}$ |                  | $^{13}\text{C}_{m1}\text{C}_4\text{H}_{10}\text{O}\cdots\text{HF}$ |                  | $^{13}\text{C}_{m2}\text{C}_4\text{H}_{10}\text{O}\cdots\text{HF}$ |                  | $\text{C}_5\text{H}_{10}^{18}\text{O}\cdots\text{HF}$ |                  |
|------|-----------|-----------|-------|------------|------------|-----------------------------------------------------------------|------------------------------|-----------------------------------------------------------------|------------------|--------------------------------------------------------------------|------------------|--------------------------------------------------------------------|------------------|-------------------------------------------------------|------------------|
| $J'$ | $K'_{-1}$ | $K'_{+1}$ | $J''$ | $K''_{-1}$ | $K''_{+1}$ | <i>obs.</i>                                                     | <i>obs.-cal.<sup>a</sup></i> | <i>obs.</i>                                                     | <i>obs.-cal.</i> | <i>obs.</i>                                                        | <i>obs.-cal.</i> | <i>obs.</i>                                                        | <i>obs.-cal.</i> | <i>obs.</i>                                           | <i>obs.-cal.</i> |
| 3    | 0         | 3         | 2     | 0          | 2          | 8507.652                                                        | 0.002                        | 8499.672                                                        | 0.001            | 8476.986                                                           | 0.001            | 8377.167                                                           | -0.002           | -                                                     | -                |
| 3    | 1         | 2         | 2     | 1          | 1          | 8782.842                                                        | 0.000                        | -                                                               | -                | 8775.945                                                           | 0.004            | 8647.800                                                           | -0.005           | 8768.755                                              | -0.005           |
| 3    | 1         | 3         | 2     | 1          | 2          | 8284.646                                                        | 0.001                        | 8273.065                                                        | 0.000            | 8239.419                                                           | -0.001           | 8156.127                                                           | 0.004            | 8239.958                                              | 0.004            |
| 4    | 0         | 4         | 3     | 0          | 3          | 11307.985                                                       | 0.000                        | 11296.848                                                       | 0.001            | 11261.009                                                          | -0.001           | 11135.731                                                          | 0.000            | -                                                     | -                |
| 4    | 1         | 3         | 3     | 1          | 2          | 11700.607                                                       | -0.002                       | 11695.608                                                       | -0.003           | 11689.641                                                          | 0.001            | 11521.065                                                          | -0.002           | 11680.497                                             | 0.000            |
| 4    | 1         | 4         | 3     | 1          | 3          | 11037.493                                                       | 0.000                        | 11021.931                                                       | 0.000            | 10975.726                                                          | -0.002           | 10866.548                                                          | 0.001            | -                                                     | -                |
| 5    | 0         | 5         | 4     | 0          | 4          | 14080.129                                                       | -0.001                       | 14065.428                                                       | 0.000            | 14012.493                                                          | 0.000            | 13867.319                                                          | 0.001            | 14012.491                                             | 0.000            |
| 5    | 1         | 4         | 4     | 1          | 3          | 14609.249                                                       | -0.001                       | 14602.776                                                       | 0.000            | 14592.497                                                          | -0.001           | 14385.702                                                          | 0.005            | 14581.812                                             | 0.002            |
| 5    | 1         | 5         | 4     | 1          | 4          | 13783.541                                                       | 0.000                        | 13763.899                                                       | 0.000            | 13704.163                                                          | -0.001           | 13570.475                                                          | 0.000            | 13706.032                                             | -0.002           |
| 6    | 0         | 6         | 5     | 0          | 5          | 16821.484                                                       | 0.000                        | 16802.761                                                       | -0.001           | 16729.306                                                          | 0.001            | 16569.162                                                          | -0.001           | -                                                     | -                |
| 6    | 1         | 5         | 5     | 1          | 4          | 17505.629                                                       | 0.002                        | 17497.514                                                       | 0.001            | 17480.700                                                          | -0.003           | -                                                                  | -                | -                                                     | -                |
| 6    | 1         | 6         | 5     | 1          | 5          | 16521.861                                                       | -0.001                       | 16498.029                                                       | -0.001           | 16423.746                                                          | 0.003            | 16266.989                                                          | -0.002           | -                                                     | -                |

<sup>a</sup>Observed-calculated values from rotational parameters of Table 2.

**Table S3.** Rotational transitions (in MHz) for the parent and isotopic species of 3,3dimethyloxetane.

|      |           | $C_5H_{10}O$ |       | $^{13}C_{\alpha}C_4H_{10}O$ |            | $^{13}C_{\beta}C_4H_{10}O$ |                              | $^{13}C_mC_4H_{10}O$ |                  | $C_5H_{10}^{18}O$ |                  |             |                  |             |                  |
|------|-----------|--------------|-------|-----------------------------|------------|----------------------------|------------------------------|----------------------|------------------|-------------------|------------------|-------------|------------------|-------------|------------------|
| $J'$ | $K'_{-1}$ | $K'_{+1}$    | $J''$ | $K''_{-1}$                  | $K''_{+1}$ | <i>obs.</i>                | <i>obs.-cal.<sup>a</sup></i> | <i>obs.</i>          | <i>obs.-cal.</i> | <i>obs.</i>       | <i>obs.-cal.</i> | <i>obs.</i> | <i>obs.-cal.</i> | <i>obs.</i> | <i>obs.-cal.</i> |
| 1    | 0         | 1            | 0     | 0                           | 0          | 6017.648                   | -0.005                       | 5980.103             | -0.001           | 6010.520          | 0.001            | 5931.485    | 0.001            | 5825.231    | 0.000            |
| 2    | 0         | 2            | 1     | 0                           | 1          | 11998.008                  | -0.002                       | 11927.285            | 0.000            | 11983.996         | 0.000            | 11820.960   | 0.000            | 11618.883   | 0.000            |
| 2    | 1         | 1            | 1     | 1                           | 0          | 12363.392                  | 0.002                        | 12265.763            | 0.000            | 12348.311         | 0.000            | 12208.353   | 0.000            | 11958.860   | 0.000            |
| 2    | 1         | 2            | 1     | 1                           | 1          | 11706.299                  | 0.002                        | 11653.770            | 0.001            | 11692.837         | -0.001           | 11516.670   | 0.000            | 11341.035   | -0.001           |
| 3    | 0         | 3            | 2     | 0                           | 2          | 17906.816                  | 0.000                        | 17811.033            | 0.000            | 17886.377         | 0.000            | 17630.322   | 0.000            | 17351.469   | 0.000            |
| 3    | 1         | 3            | 2     | 1                           | 2          | 17537.404                  | 0.001                        | 17461.150            | 0.000            | 17517.358         | 0.000            | 17250.256   | 0.000            | 16992.802   | 0.000            |

<sup>[a]</sup>Observed-calculated values from rotational parameters of Table 2

Supplementary Material for PCCP  
This journal is © The Owner Societies 2005
